# Supplementary material for: The coulombic σ-hole model describes bonding in CX3I⋯Y− complexes completely
Source: Royal Society of Chemistry journal article supplement (doi:10.1039/c8cp03079k), 2018-01-01
Supplement: c8cp03079k1.pdf [file c8cp03079k1.pdf]

## The Coulombic $\sigma$ -hole model describes bonding in $CX_3I...Y^-$ complexes completely

Timothy Clark<sup>\*a</sup> and Andreas Heßelmann<sup>b</sup>

### Electronic Supplementary Information

#### Table of Contents

|     |                                                       |   |
|-----|-------------------------------------------------------|---|
| 1.  | Figure S1                                             | 2 |
| 2.  | Geometries, total and zero-point vibrational energies | 3 |
| 2.1 | CF <sub>3</sub> I complexes                           | 5 |
| 2.2 | CCl <sub>3</sub> I complexes                          | 7 |
| 2.3 | CBr <sub>3</sub> I complexes                          | 9 |
| 2.4 | Cl <sub>4</sub> complexes                             |   |

---

<sup>a</sup> Computer-Chemie-Centrum, Department of Chemistry and Pharmacy, Friedrich-Alexander-Universität Erlangen-Nürnberg, Nägelsbachstr. 25, 91052 Erlangen, Germany. Tim.Clark@fau.de

<sup>b</sup> Lehrstuhl für Theoretische Chemie, Department of Chemistry and Pharmacy, Friedrich-Alexander-Universität Erlangen-Nürnberg, Erlangen, Germany.

---

## 1. Figure S1

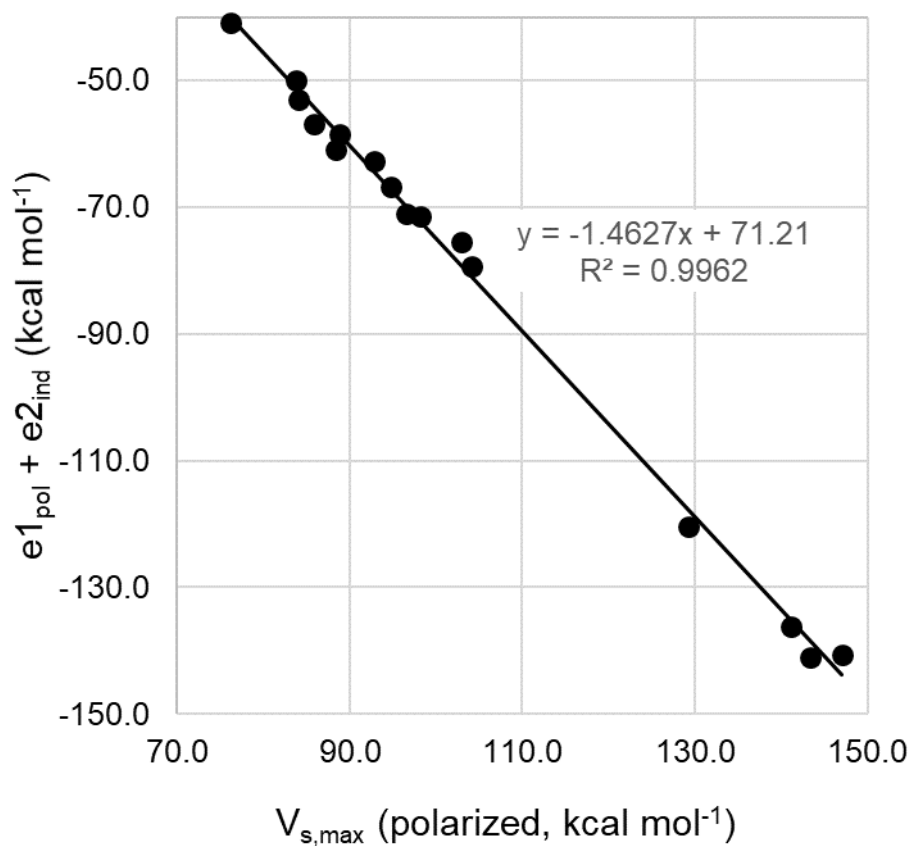

**Figure S1:** Correlation between the Coulombic interaction energy ( $e1_{\text{pol}} + e2_{\text{ind}}$ ) from DFT-SAPT calculations and  $V_{\text{s,max}}$  from the point-charge polarized CCSD/aug-cc-pVTZ calculations. The regression equation and  $R^2$  are shown.

## 2. Geometries and energies

### 2.1 CF<sub>3</sub>I complexes

#### F<sub>3</sub>Cl...F<sup>-</sup>

|                               |   |                              |
|-------------------------------|---|------------------------------|
| Counterpoise corrected energy | = | -731.926169423256            |
| BSSE energy                   | = | 0.002841711330               |
| sum of fragments              | = | -731.857060940152            |
| complexation energy           | = | -45.15 kcal/mole (raw)       |
| complexation energy           | = | -43.37 kcal/mole (corrected) |

# mp2/aug-cc-pvtz counterpoise=2 extrabasis pseudo=read guess=huckel

F3Cl...F-, C3V

-1,1  
 I,0,0.,0.,0.  
 C,0,0.,0.,2.185747  
 F,0,1.247729,0.,2.734158  
 F,0,-0.623865,1.080565,2.734158  
 F,0,-0.623865,-1.080565,2.734158  
 F,0,0.,0.,-2.216503

HF=-99.4508069  
 MP2=-99.7458784

#### F<sub>3</sub>Cl...Cl<sup>-</sup>

|                               |   |                              |
|-------------------------------|---|------------------------------|
| Counterpoise corrected energy | = | -1091.935186271393           |
| BSSE energy                   | = | 0.002144093741               |
| sum of fragments              | = | -1091.895175363120           |
| complexation energy           | = | -26.45 kcal/mole (raw)       |
| complexation energy           | = | -25.11 kcal/mole (corrected) |

# mp2/aug-cc-pvtz counterpoise=2 extrabasis pseudo=read guess=huckel

F3Cl...Cl-, C3V

-1,1  
 I,0,0.,0.,-0.078564  
 C,0,0.,0.,2.085402  
 F,0,1.246862,0.,2.614852  
 F,0,-0.623431,1.079814,2.614852  
 F,0,-0.623431,-1.079814,2.614852  
 Cl,0,0.,0.,-2.907429

HF=-459.5734815  
 MP2=-459.7807919

#### F<sub>3</sub>Cl...Br<sup>-</sup>

Counterpoise corrected energy = -3204.924800106302  
 BSSE energy = 0.003357474259  
 sum of fragments = -3204.889640069748  
 complexation energy = -24.17 kcal/mole (raw)  
 complexation energy = -22.06 kcal/mole (corrected)

# mp2/aug-cc-pvtz counterpoise=2 extrabasis pseudo=read guess=huckel

F3Cl Br-, C3V  
 -1,1  
 I,0,0.,0.,0.15951  
 C,0,0.,0.,2.323226  
 F,0,0.,1.247063,2.848255  
 F,0,-1.079988,-0.623531,2.848255  
 F,0,1.079988,-0.623531,2.848255  
 Br,0,0.,0.,-2.837037

HF=-2572.5336777  
 MP2=-2572.7748313

### **F<sub>3</sub>Cl...I<sup>-</sup>**

Counterpoise corrected energy = -927.111214668397  
 BSSE energy = 0.003509170372  
 sum of fragments = -927.080985685503  
 complexation energy = -21.17 kcal/mole (raw)  
 complexation energy = -18.97 kcal/mole (corrected)

# mp2/aug-cc-pvtz counterpoise=2 extrabasis pseudo=read guess=huckel

F3Cl...I-, C3V  
 -1,1  
 I,0,0.,0.,0.  
 C,0,0.,0.,2.166122  
 F,0,1.246638,0.,2.686734  
 F,0,-0.623319,1.07962,2.686734  
 F,0,-0.623319,-1.07962,2.686734  
 I,0,0.,0.,-3.228595

HF=-294.7464575  
 MP2=-294.9658305

## 2.2 CCl<sub>3</sub>I complexes

### Cl<sub>3</sub>Cl...F<sup>-</sup>

|                               |   |                              |
|-------------------------------|---|------------------------------|
| Counterpoise corrected energy | = | -1811.849479362937           |
| BSSE energy                   | = | 0.003289214624               |
| sum of fragments              | = | -1811.773570051289           |
| complexation energy           | = | -49.70 kcal/mole (raw)       |
| complexation energy           | = | -47.63 kcal/mole (corrected) |

# mp2/aug-cc-pvtz counterpoise=2 extrabasis pseudo=read guess=huckel

Cl3Cl---F-, C3V

-1,1  
 I,0,0.,0.,0.  
 C,0,0.,0.,2.232236  
 Cl,0,1.667659,0.,2.899362  
 Cl,0,-0.83383,1.444235,2.899362  
 Cl,0,-0.83383,-1.444235,2.899362  
 F,0,0.,0.,-2.158245

HF=-99.4508069  
 MP2=-99.7458784

### Cl<sub>3</sub>Cl...Cl<sup>-</sup>

|                               |   |                              |
|-------------------------------|---|------------------------------|
| Counterpoise corrected energy | = | -2171.856497132947           |
| BSSE energy                   | = | 0.002433451659               |
| sum of fragments              | = | -2171.810196421032           |
| complexation energy           | = | -30.58 kcal/mole (raw)       |
| complexation energy           | = | -29.05 kcal/mole (corrected) |

#mp2/aug-cc-pvtz counterpoise=2 extrabasis pseudo=read guess=huckel

Cl3Cl...Cl-, C3V

-1,1  
 I,0,-0.000251,-0.000085,-0.150138  
 C,0,0.000205,-0.000005,2.068235  
 Cl,0,1.667669,-0.000464,2.717639  
 Cl,0,-0.832902,1.444269,2.71798  
 Cl,0,-0.8338,-1.443695,2.718093  
 Cl,0,-0.000921,-0.000019,-2.869609

HF=-459.5734815  
 MP2=-459.7807919

### Cl<sub>3</sub>Cl...Br<sup>-</sup>

|                               |   |                              |
|-------------------------------|---|------------------------------|
| Counterpoise corrected energy | = | -4284.845938239818           |
| BSSE energy                   | = | 0.003870694964               |
| sum of fragments              | = | -4284.804295032996           |
| complexation energy           | = | -28.56 kcal/mole (raw)       |
| complexation energy           | = | -26.13 kcal/mole (corrected) |

# mp2/aug-cc-pvtz counterpoise=2 extrabasis pseudo=read guess=huckel

Cl<sub>3</sub>Cl...Br-, C3V

-1,1  
 I,0,0.000289,-0.000055,-0.12472  
 C,0,-0.000053,-0.000008,2.098058  
 Cl,0,1.667301,-0.000157,2.743277  
 Cl,0,-0.833765,1.444173,2.742756  
 Cl,0,-0.834071,-1.443988,2.742815  
 Br,0,0.0003,0.000035,-2.999986

HF=-2572.5336777  
 MP2=-2572.7748313

**Cl<sub>3</sub>Cl...I<sup>-</sup>**

|                               |   |                              |
|-------------------------------|---|------------------------------|
| Counterpoise corrected energy | = | -2007.032559072591           |
| BSSE energy                   | = | 0.004147912638               |
| sum of fragments              | = | -2006.995035188089           |
| complexation energy           | = | -26.15 kcal/mole (raw)       |
| complexation energy           | = | -23.55 kcal/mole (corrected) |

#mp2/aug-cc-pvtz counterpoise=2 extrabasis pseudo=read guess=huckel

Cl<sub>3</sub>Cl...I-, C3V

-1,1  
 I,0,0.,0.,0.  
 C,0,0.,0.,2.235684  
 Cl,0,1.667991,0.,2.87391  
 Cl,0,-0.833996,1.444523,2.87391  
 Cl,0,-0.833996,-1.444523,2.87391  
 I,0,0.,0.,-3.082181

HF=-294.7464575  
 MP2=-294.9658305

## 2.3 CBr<sub>3</sub>I complexes

### Br<sub>3</sub>Cl...F<sup>-</sup>

|                               |   |                              |
|-------------------------------|---|------------------------------|
| Counterpoise corrected energy | = | -8150.806199131169           |
| BSSE energy                   | = | 0.003676257050               |
| sum of fragments              | = | -8150.728184459239           |
| complexation energy           | = | -51.26 kcal/mole (raw)       |
| complexation energy           | = | -48.95 kcal/mole (corrected) |

# mp2/aug-cc-pvtz counterpoise=2 extrabasis pseudo=read guess=huckel

Br<sub>3</sub>Cl...F<sup>-</sup>, C3V

-1,1  
 I,0,0.,0.,0.  
 C,0,0.,0.,2.237354  
 Br,0,1.81749,0.,2.956915  
 Br,0,-0.908745,1.573993,2.956915  
 Br,0,-0.908745,-1.573993,2.956915  
 F,0,0.,0.,-2.144422

HF=-99.4508069  
 MP2=-99.7458784

### Br<sub>3</sub>Cl...Cl<sup>-</sup>

|                               |   |                              |
|-------------------------------|---|------------------------------|
| Counterpoise corrected energy | = | -8510.812837961297           |
| BSSE energy                   | = | 0.002817390696               |
| sum of fragments              | = | -8510.764459627151           |
| complexation energy           | = | -32.13 kcal/mole (raw)       |
| complexation energy           | = | -30.36 kcal/mole (corrected) |

# mp2/aug-cc-pvtz counterpoise=2 extrabasis pseudo=read guess=huckel

Br<sub>3</sub>Cl...Cl<sup>-</sup>, C3V

-1,1  
 I,0,-0.000039,0.000044,-0.160999  
 C,0,0.000055,0.000006,2.064796  
 Br,0,1.81771,0.000301,2.767755  
 Br,0,-0.909012,1.573953,2.767869  
 Br,0,-0.908462,-1.574274,2.767807  
 Cl,0,-0.000252,-0.00003,-2.854718

HF=-459.5734815  
 MP2=-459.7807919

### Br<sub>3</sub>Cl...Br<sup>-</sup>

|                               |   |                     |
|-------------------------------|---|---------------------|
| Counterpoise corrected energy | = | -10623.802288398010 |
|-------------------------------|---|---------------------|

|                     |   |                              |
|---------------------|---|------------------------------|
| BSSE energy         | = | 0.004359606079               |
| sum of fragments    | = | -10623.758456775530          |
| complexation energy | = | -30.24 kcal/mole (raw)       |
| complexation energy | = | -27.50 kcal/mole (corrected) |

#mp2/aug-cc-pvtz counterpoise=2 extrabasis pseudo=read guess=huckel

Br3Cl...Br-, C3V

-1,1

I,0,-0.000056,-0.000028,-0.13662

C,0,-0.000014,-0.000006,2.09442

Br,0,1.817954,-0.000392,2.792798

Br,0,-0.908663,1.57463,2.792754

Br,0,-0.909357,-1.574231,2.792767

Br,0,0.000134,0.000026,-2.98361

HF=-2572.5336777

MP2=-2572.7748313

**Br<sub>3</sub>Cl...I<sup>-</sup>**

|                               |   |                    |
|-------------------------------|---|--------------------|
| Counterpoise corrected energy | = | -8345.989068957093 |
|-------------------------------|---|--------------------|

|             |   |                |
|-------------|---|----------------|
| BSSE energy | = | 0.004688856734 |
|-------------|---|----------------|

|                  |   |                    |
|------------------|---|--------------------|
| sum of fragments | = | -8345.948958216213 |
|------------------|---|--------------------|

|                     |   |                        |
|---------------------|---|------------------------|
| complexation energy | = | -28.11 kcal/mole (raw) |
|---------------------|---|------------------------|

|                     |   |                              |
|---------------------|---|------------------------------|
| complexation energy | = | -25.17 kcal/mole (corrected) |
|---------------------|---|------------------------------|

#mp2/aug-cc-pvtz counterpoise=2 extrabasis pseudo=read guess=huckel

Br3Cl...I-, C3V

-1,1

I,0,0.,0.,0.

C,0,0.,0.,2.246664

Br,0,1.818967,0.,2.938601

Br,0,-0.909484,1.575272,2.938601

Br,0,-0.909484,-1.575272,2.938601

I,0,0.,0.,-3.048346

HF=-294.7464575

MP2=-294.9658305



## 2.1 Cl<sub>4</sub> complexes

### I<sub>3</sub>Cl...F<sup>-</sup>

|                               |   |                              |
|-------------------------------|---|------------------------------|
| Counterpoise corrected energy | = | -1317.356488383735           |
| BSSE energy                   | = | 0.003731617322               |
| sum of fragments              | = | -1317.277117952241           |
| complexation energy           | = | -52.15 kcal/mole (raw)       |
| complexation energy           | = | -49.81 kcal/mole (corrected) |

# mp2/aug-cc-pvtz counterpoise=2 extrabasis pseudo=read guess=huckel

I3Cl...F-, C3V

-1,1

I,0,0.,0.,0.

C,0,0.,0.,2.251589

I,0,2.023733,0.,3.033946

I,0,-1.011866,1.752604,3.033946

I,0,-1.011866,-1.752604,3.033946

F,0,0.,0.,-2.129774

HF=-99.4508069

MP2=-99.7458784

### I<sub>3</sub>Cl...Cl<sup>-</sup>

|                               |   |                              |
|-------------------------------|---|------------------------------|
| Counterpoise corrected energy | = | -1677.363047706493           |
| BSSE energy                   | = | 0.002841002609               |
| sum of fragments              | = | -1677.312959857242           |
| complexation energy           | = | -33.21 kcal/mole (raw)       |
| complexation energy           | = | -31.43 kcal/mole (corrected) |

#mp2/aug-cc-pvtz counterpoise=2 extrabasis pseudo=read guess=huckel

I3Cl...Cl-, C3V

-1,1

I,0,0.001355,0.000171,-0.172746

C,0,-0.000365,0.000002,2.070345

I,0,2.025178,0.002179,2.837975

I,0,-1.012069,-1.755895,2.835401

I,0,-1.016033,1.753502,2.835677

Cl,0,0.001935,0.000042,-2.83938

HF=-459.5734815

MP2=-459.7807919

### I<sub>3</sub>Cl...Br<sup>-</sup>

|                               |   |                    |
|-------------------------------|---|--------------------|
| Counterpoise corrected energy | = | -3790.352650538836 |
|-------------------------------|---|--------------------|

BSSE energy = 0.004462479319  
 sum of fragments = -3790.306830654295  
 complexation energy = -31.55 kcal/mole (raw)  
 complexation energy = -28.75 kcal/mole (corrected)

#mp2/aug-cc-pvtz counterpoise=2 extrabasis pseudo=read guess=huckel

I<sub>3</sub>Cl...Br<sup>-</sup>, C<sub>3</sub>V

-1,1  
 I,0,0.,0.000037,-0.150042  
 C,0,-0.000102,0.000003,2.099621  
 I,0,2.02652,0.000391,2.861414  
 I,0,-1.013151,-1.75541,2.861125  
 I,0,-1.013887,1.754983,2.861117  
 Br,0,0.000619,-0.000003,-2.965963

HF=-2572.5336777  
 MP2=-2572.7748313

**I<sub>3</sub>Cl...Br<sup>-</sup>**

Counterpoise corrected energy = -1512.539870026951  
 BSSE energy = 0.004835289040  
 sum of fragments = -1512.497037760089  
 complexation energy = -29.91 kcal/mole (raw)  
 complexation energy = -26.88 kcal/mole (corrected)

# mp2/aug-cc-pvtz counterpoise=2 extrabasis pseudo=read guess=huckel

I<sub>3</sub>Cl...I<sup>-</sup>, C<sub>3</sub>V

-1,1  
 I,0,0.,0.,0.  
 C,0,0.,0.,2.269196  
 I,0,2.029159,0.,3.02386  
 I,0,-1.01458,1.757304,3.02386  
 I,0,-1.01458,-1.757304,3.02386  
 I,0,0.,0.,-3.01048

HF=-294.7464575  
 MP2=-294.9658305
